# Supplementary material
Source: publisher site journal article supplement (https://www.spandidos-publications.com/8240/downloadSupplementary)

Figure S1. Influence of high-dose ascorbate after preincubation with holo transferrin on the viability of human pancreatic cancer cell lines. The cell lines BxPC-3, MIA PaCa-2, and PANC-1 were treated for 24 h with the indicated ascorbate concentrations after incubation with 10  $\mu$ M Holo Tf for 24 h as a preincubation. Triton™ X-100 at 0.1% (v/v) served as a positive control. Cell viability was measured after treatment by MUH assay. The results are presented as a percentage of fluorescence intensity relative to the untreated control. Three independent experiments were performed in duplicates. Error bars represent the mean  $\pm$  SD, statistical analysis with one-way ANOVA and subsequent Dunnett's multiple comparisons test, confidence interval 95%. \* $P \leq 0.05$ . Asc, ascorbate; Holo Tf, holo transferrin; MUH, 4-methylumbelliferyl heptanoate; ns, not significant.

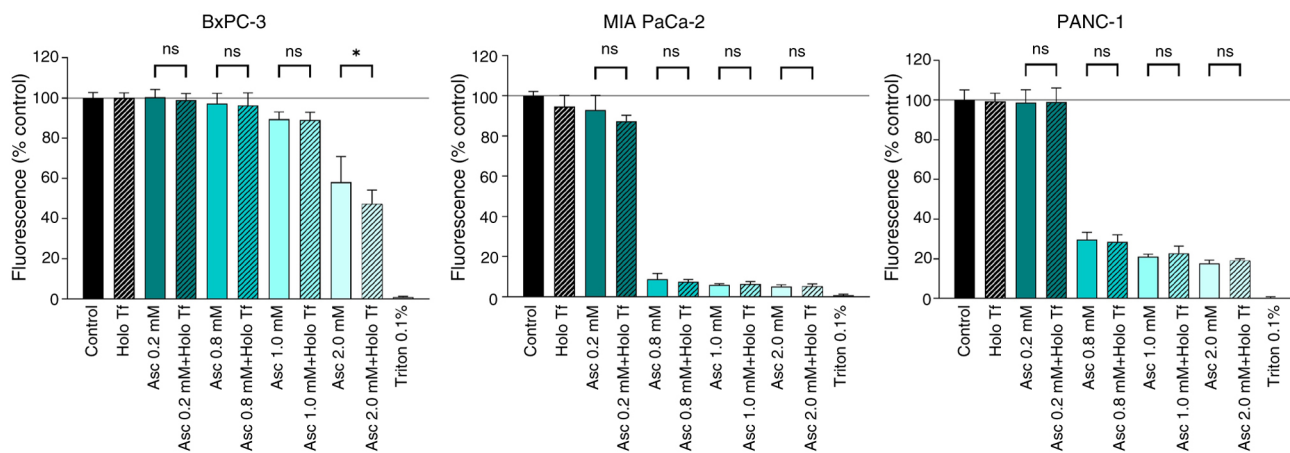

Supplement: Supplementary file 1 [file downloadSupplementary]
